# Supplementary material for: From micron to nano-curcumin by sophorolipid co-processing: highly enhanced bioavailability, fluorescence, and anti-cancer efficacy
Source: Royal Society of Chemistry journal article supplement (doi:10.1039/c4ra07300b), 2014-01-01
Supplement: c4ra07300b1.pdf [file c4ra07300b1.pdf]

## Electronic Supplementary Information (ESI)

**From Micron to Nano-Curcumin by sophorolipid co-processing: Highly enhanced bioavailability, fluorescence, and anti-cancer efficacy**

Pradeep Kumar Singh<sup>a,b</sup>, Kirtee Wani<sup>c</sup>, Ruchika Kaul-Ghanekar<sup>c</sup>, Asmita Prabhune<sup>b,\*</sup> and Satishchandra Ogale<sup>a,\*</sup>

- Physical and Materials Chemistry Division, National Chemical Laboratory (NCL), Council of Scientific and Industrial Research (CSIR), Dr. Homi Bhabha Road, Pashan, Pune 411008, India  
E-mail: [sb.ogale@ncl.res.in](mailto:sb.ogale@ncl.res.in)
- Biochemical Sciences Division, National Chemical Laboratory (NCL), Council of Scientific and Industrial Research (CSIR), Dr. Homi Bhabha Road, Pashan, Pune 411008, India  
E-mail: [aa.prabhune@ncl.res.in](mailto:aa.prabhune@ncl.res.in)
- Cell and Translational Research Lab, Interactive Research School for Health Affairs (IRSHA), Bharati Vidyapeeth Deemed University, Pune

### 1. Sophorolipid (SL(A)) synthesis

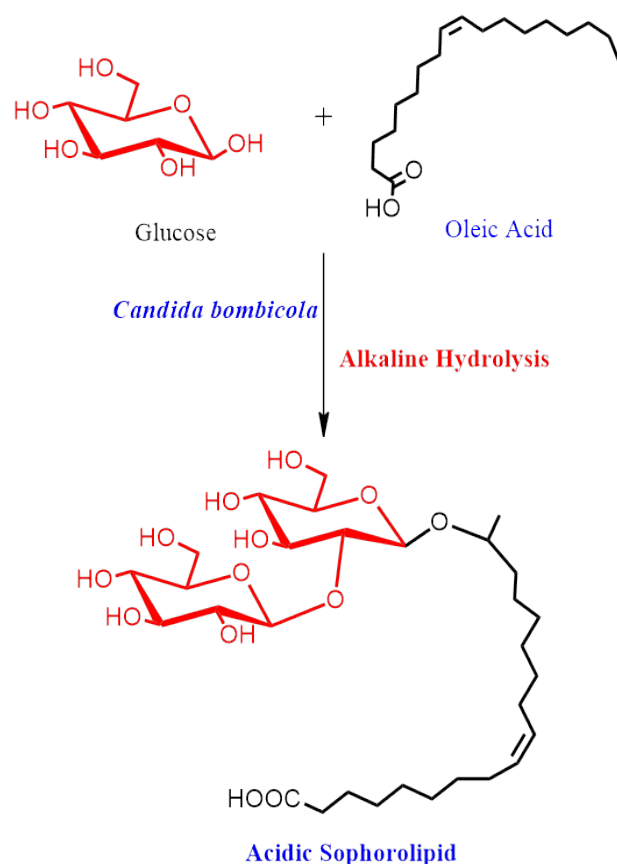

**ESI Fig. S1** Basic structure of SL produced by yeast *C. bombicola* after purification process

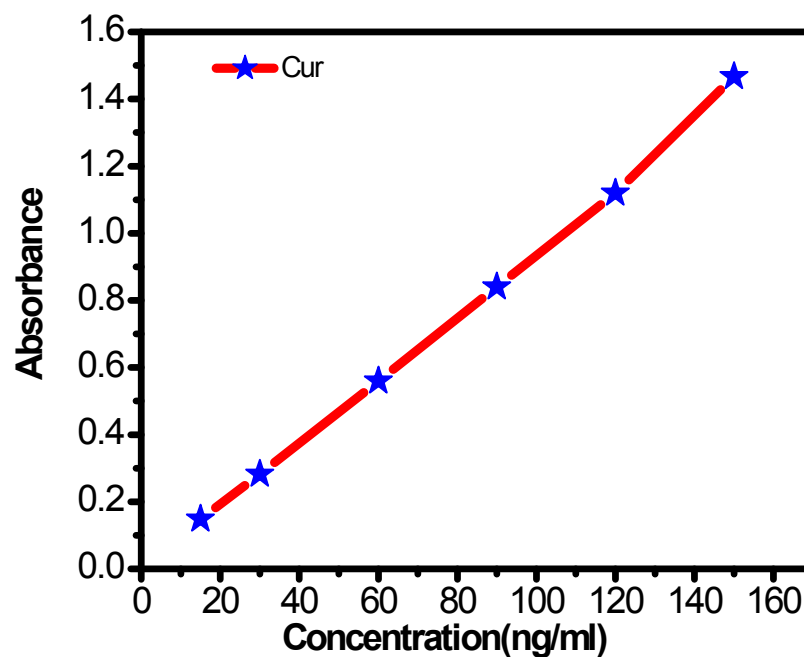

**ESI Fig. S2** The curcumin concentration calculated using standard solutions with different amounts of pristine curcumin dissolved in ethanol. Curcumin was dissolved in ethanol and measured for absorbance at 420 nm using a UV-Vis spectrophotometer to determine its concentration in the SL(A)+Cur nano-complex.

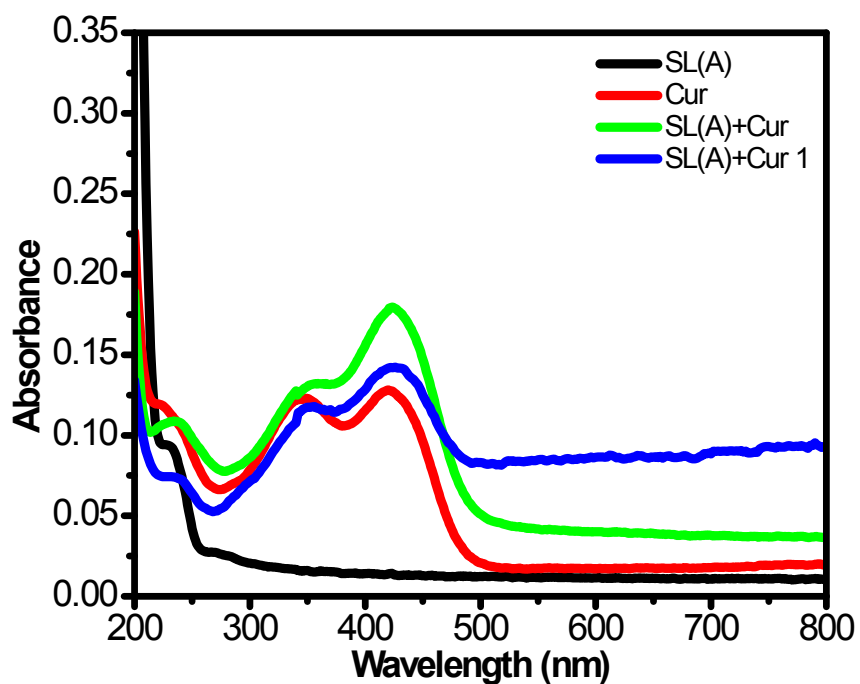

**ESI Fig. S3** UV-Visible spectra of SL (A), Curcumin and SL(A)+ Cur solutions. SL(A) solution shows absorbance at  $\lambda=234$  nm and Curcumin solution at  $\lambda=344$  and 420 nm while SL(A) + Cur showing increase absorption at one peak at 420 nm. Blue line shows the stability of nano complex after four months.

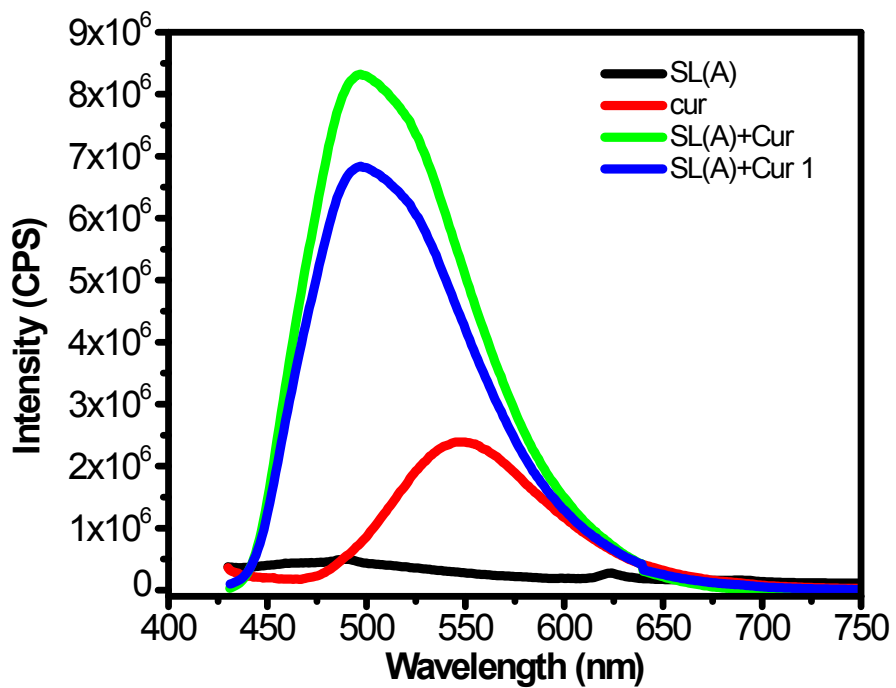

**ESI Fig. S4** Photoluminescence study of SL(A). Curcumin and SL(A)+ Cur solutions. The SL(A) solution shows no PL. Curcumin solution shows PL at 550 nm while SL(A) + Cur showing very strong Photoluminescence at 500 nm; Blue line shows the stability of nano complex after four months.

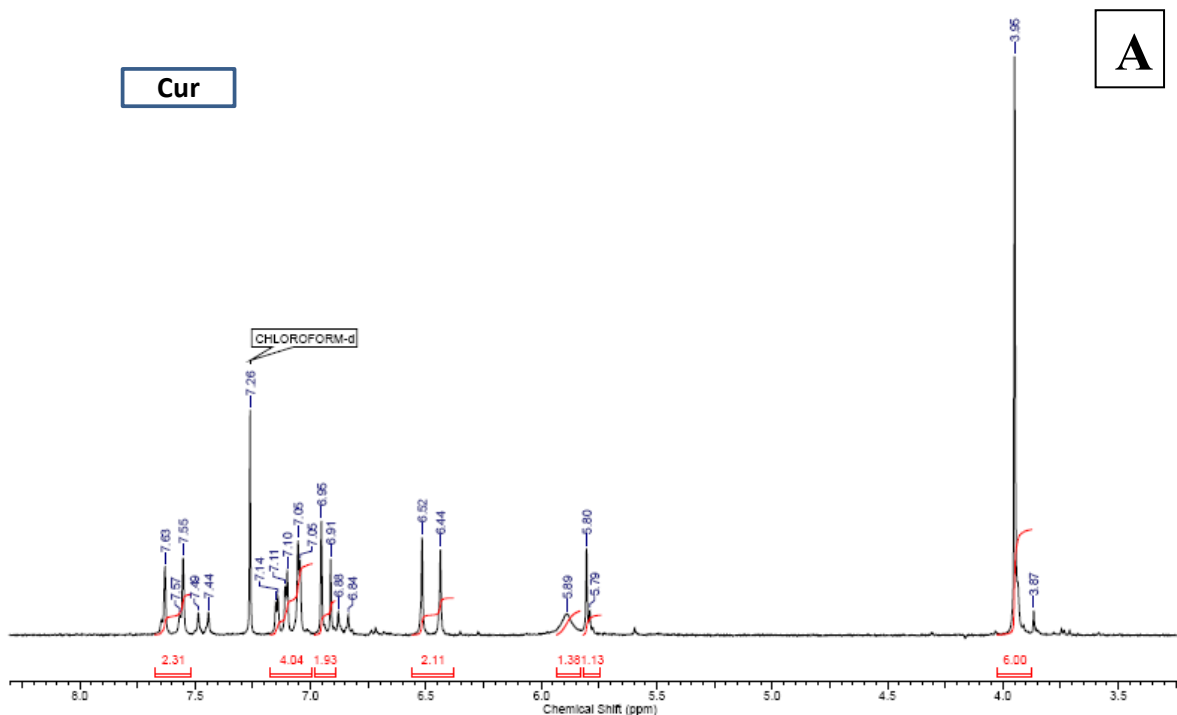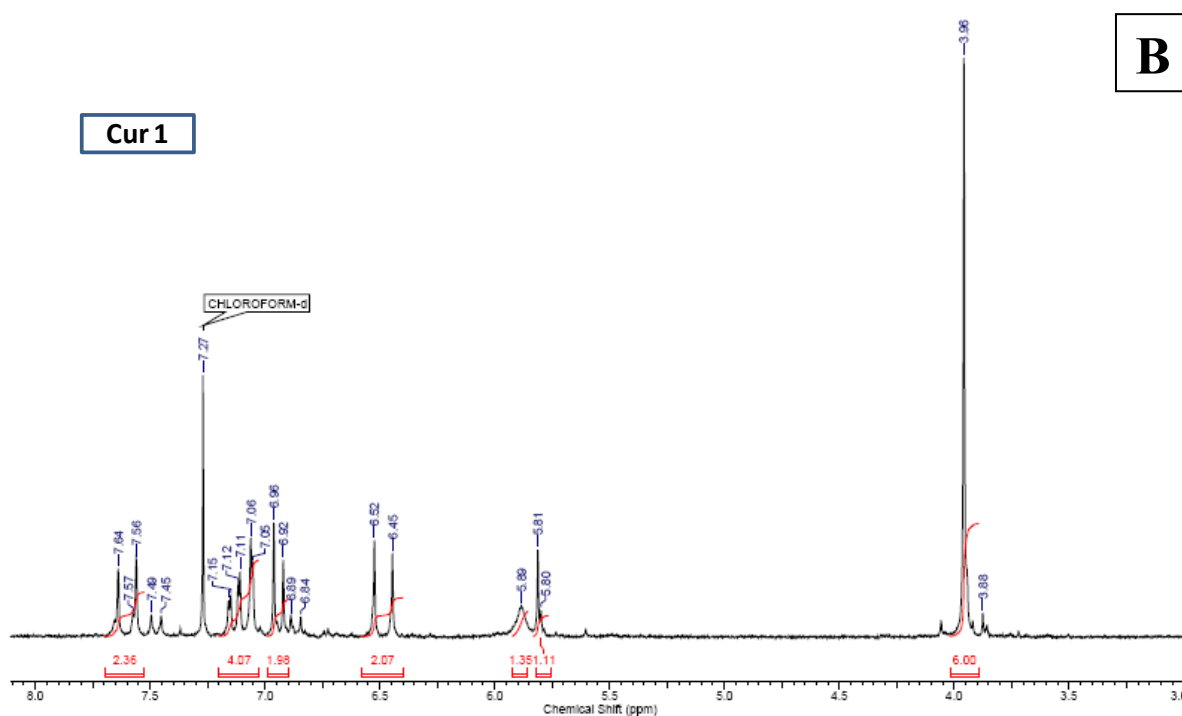

**ESI Fig. S5** NMR study of **(A)** Curcumin and **(B)** curcumin in SL(A)+ Cur solutions after four month stability.

### Sample preparation for NMR

Chloroform was added in SL(A)+Cur aqueous solution to extract curcumin from nano-complex. The sample was rotator evaporator and vacuum dried for 60 min to remove chloroform. Curcumin crystals, as a control, were dissolved in chloroform and vacuum-dried

as above the encapsulated curcumin. The obtained curcumin powders were dissolved in deuterated chloroform for  $^1\text{H}$  NMR study.
